# Supplementary material
Source: publisher figshare collection journal article supplement (https://rs.figshare.com/ndownloader/files/8649817)
Supplement: Supplementary file 1 [file 8649817]

## Sheet: Recovered_Sheet1
participant_number	species	age	sex	trial_1 (2=pass, 1= fail)	trial_2	trial_3	trial_4	trial_5	trial_6	trial_7	trial_8	trial_9	trial_10	trial_11	trial_12
1	human	3	male	2	2	2	2	2	2	2	2	2	2	2	2
2	human	3	male	2	1	2	1	1	1	1	1	1	1	1	1
3	human	3	male	2	2	2	2	2	2	2	2	2	2	2	2
4	human	2	female	1	1	1	1	1	1	1	1	1	1	1	1
5	human	3	female	1	1	1	1	1	1	1	1	1	1	1	1
6	human	4	female	1	1	1	1	1	1	1	1	1	1	1	1
7	human	4	female	1	1	1	2	2	2	2	2	2	2	2	2
8	human	4	male	2	1	1	1	1	1	1	1	1	2	1	1
9	human	2	male	1	1	1	1	1	1	1	1	1	1	1	1
10	human	4	male	2	2	2	2	2	2	2	2	2	2	2	2
11	human	4	female	2	1	1	1	2	2	2	2	2	2	2	2
12	human	2	female	1	1	1	1	1	1	1	1	1	1	1	1
13	human	4	female	1	1	1	1	1	1	1	1	1	1	1	1
14	human	4	male	2	2	2	2	2	2	2	2	2	2	2	2
15	human	2	male	1	1	1	1	1	1	1	1	1	1	1	1
16	human	3	male	1	1	1	2	1	1	1	1	1	1	1	1
17	human	4	male	1	1	1	1	1	1	1	1	1	2	2	2
18	human	2	female	1	1	1	1	1	1	1	1	1	1	1	1
19	human	2	female	1	1	1	1	1	1	1	1	1	1	1	1
20	human	4	male	1	1	1	1	1	1	1	1	1	1	1	1
21	human	4	male	1	1	1	1	1	1	1	1	2	2	2	2
22	human	2	female	2	2	2	2	2	2	2	2	2	2	2	2
23	human	4	male	2	2	2	2	2	2	2	2	2	2	2	2
24	human	2	male	1	1	1	1	1	1	1	1	1	1	1	1
25	human	3	female	1	1	1	1	1	1	1	1	1	1	1	1
26	human	3	female	1	1	1	1	1	1	1	1	1	1	1	1
27	human	2	male	1	1	1	1	1	1	1	1	1	1	1	1
28	human	2	male	1	1	1	1	1	1	1	1	1	1	1	1
29	human	3	female	1	1	1	1	1	1	1	1	1	1	1	1
30	human	3	male	1	1	1	1	1	1	1	1	1	1	1	1
31	human	3	female	1	1	1	1	1	1	1	1	1	1	1	1
32	human	2	female	1	1	1	1	1	1	1	1	1	1	1	1
33	human	3	female	1	1	1	1	1	1	1	1	1	1	1	1
34	human	3	female	1	1	1	1	1	1	1	1	1	1	1	1
35	human	2	male	1	1	1	1	1	1	1	1	1	1	1	1
36	human	4	female	2	2	2	2	2	2	2	2	2	2	2	2
Cassie	chimpanzee	43	male	1	1	1	1	1	1	1	1	1	1	1	1
Samantha	chimpanzee	31	female	1	1	1	1	1	1	1	1	1	1	1	1
Holly	chimpanzee	26	female	1	1	1	1	1	1	1	1	1	1	1	1
Alon	chimpanzee	8	male	1	1	1	1	1	1	1	1	1	1	1	1
Leakey	chimpanzee	21	female	1	1	1	1	1	1	1	1	1	1	1	1
